# Supplementary material for: Interactions between Social Structure, Demography, and Transmission Determine Disease Persistence in Primates
Source: PLoS One. 2013 Oct 18;8(10):e76863. doi: 10.1371/journal.pone.0076863 (PMC3800049; doi:10.1371/journal.pone.0076863)
Supplement: Table S1 — Contact structure for intragroup (matrices1–5) and intergroup (matrices 6–10) interactions given social system (rows) and transmission mode (columns). The 5 age/sex classes (life-history stages) for which these are coded are infants (I), subadult females (sAf), subadult males (sAm), adult females (Af) and adult males (Am). Vertical transmission is written (Afi). The infectious parameter β is used for intimate contact transmission and βv for vector transmission. βFIGHT implies the disease risk from an aggressive interaction, and βGROOM is the risk during a grooming interaction. In matrices 6–10 where intergroup interactions are described, dichotomous interactions for emigrating (ε and immigrating (i) individuals can occur, and the direction of these is described using a 1, 2 from-to group notation. Δ is used for vector transmission between groups as a variable for distance between the two groups. (DOCX) [file pone.0076863.s002.docx]

**Table S1**

**1. Infant Intragroup Transmission Possibilities**

|  | STI | Fecal Oral | Aggression/Grooming | Aerosol | Vector |
| --- | --- | --- | --- | --- | --- |
| FF  *(Bonobos)* | *Bonobo sex:*  I[(βAf)+ (βAm) +(βsAm) + (βsAm)+ (βI)]  *Vertical:* I(βAfi) | I[(βAf)+ (βAm) +(βsAm) + (βsAm) + (βI)] | 0 | I[(βAf)+ (βAm) +(βsAm) + (βsAm) + (βI)] | I[(βvAm) + (βvAf) + (βvsAm) + (βvsAf)+ (βvI)] |
| MM | *Vertical:* I(βAfi) | I[(βAf)+ (βAm) +(βsAm) + (βsAm) + (βI)] | 0 | I[(βAf)+ (βAm) +(βsAm) + (βsAm) + (βI)] | I[(βvAm) + (βvAf) + (βvsAm) + (βvsAf)+ (βvI)] |
| UM | *Vertical:* I(βAfi) | I[(βAf)+ (βAm) +(βsAm) + (βsAm) + (βI)] | 0 | I[(βAf)+ (βAm) +(βsAm) + (βsAm) + (βI)] | I[(βvAm) + (βvAf) + (βvsAm) + (βvsAf)+ (βvI)] |
| MO | *Vertical:* I(βAfi) | I[(βAf)+ (βAm) + (βI)] | 0 | I[(βAf)+ (βAm) + (βI)] | I[(βvAm) + (βvAf) + (βvI)] |
| SO  *(infants still in the natal group)* | Vertical: I(βAfi) | I[(βAf)+ (βAm) + (βI)] | 0 | I[(βAf)+ (βAm) + (βI)] | I[(βvAm) + (βvAf) + (βvI)] |

**2. Subadult Female Intragroup Transmission Possibilities**

|  | STI | Fecal Oral | Aggression/Grooming | Aerosol | Vector |
| --- | --- | --- | --- | --- | --- |
| FF  *(Bonobos)* | sAf[(βAf)+ (βAm) +(βsAm) + (βsAm)+ (βI)] | sAf[(βAf)+ (βAm) +(βsAm) + (βsAm)+ (βI)] | *Dominance fights*:  sAf [βFIGHT (Am + Af + sAm + sAf)]  -------------------------------------------  *Allomothering and grooming favors:*  sAf [βGROOM (Am + Af + sAf)] | sAf[(βAf)+ (βAm) +(βsAm) + (βsAm)+ (βI)] | I[(βvAm) + (βvAf) + (βvsAm) + (βvsAf)+ (βvI)] |
| MM | sAf[(βAm) *+(βsAm)*]  *Subadult males may copulate occasionally* | sAf[(βAf)+ (βAm) +(βsAm) + (βsAm)+ (βI)] | *Dominance fights:*  sAf [βFIGHT (Am + Af + sAm + sAf)]  -------------------------------------------  *Allomothering and grooming favors:*  sAf [βGROOM (Am + Af + sAf)] | sAf[(βAf)+ (βAm) +(βsAm) + (βsAm)+ (βI)] | I[(βvAm) + (βvAf) + (βvsAm) + (βvsAf)+ (βvI)] |
| UM | sAf[(βAm) *+(βsAm)*]  *Subadult males may copulate, but tend to migrate instead* | sAf[(βAf)+ (βAm) +(βsAm) + (βsAm)+ (βI)] | *Dominance fights:*  sAf [βFIGHT (Am + Af + sAm + sAf)]  -------------------------------------------  *Allomothering and grooming favors:*  sAf [βGROOM (Am + Af + sAf)] | sAf[(βAf)+ (βAm) +(βsAm) + (βsAm)+ (βI)] | I[(βvAm) + (βvAf) + (βvsAm) + (βvsAf)+ (βvI)] |
| MO | 0 | 0 | 0 | 0 | 0 |
| SO | 0 | 0 | 0 | 0 | 0 |

#### 3. Subadult Male Intragroup Transmission Possibilities

|  | STI | Fecal Oral | Aggression/Grooming | Aerosol | Vector |
| --- | --- | --- | --- | --- | --- |
| FF  *(Bonobos)* | sAm[(βAf)+ (βAm) +(βsAm) + (βsAm)+ (βI)] | sAm[(βAf)+ (βAm) +(βsAm) + (βsAm)+ (βI)] | *Dominance fights:*  Am [βFIGHT (Am + Af + sAm + sAf + I)  -------------------------------------------  *Grooming favors:*  Am [βGROOM (Am + Af + sAm + sAf)] | sAm[(βAf)+ (βAm) +(βsAm) + (βsAm)+ (βI)] | sAm[(βvAm) + (βvAf) + (βvsAm) + (βvsAf)+ (βvI)] |
| MM | 0 | sAm[(βAf)+ (βAm) +(βsAm) + (βsAm)+ (βI)] | *Dominance fights:*  Am [βFIGHT (Am + sAm)]  -------------------------------------------  *Grooming favors:*  Am [βGROOM (Am + Af + sAm + sAf)] | sAm[(βAf)+ (βAm) +(βsAm) + (βsAm)+ (βI)] | sAm[(βvAm) + (βvAf) + (βvsAm) + (βvsAf)+ (βvI)] |
| UM | 0 | sAm[(βAf)+ (βAm) +(βsAm) + (βsAm)+ (βI)] | *Dominance fights:*  Am [βFIGHT (Am + sAm)]  -------------------------------------------  *Grooming favors:*  Am [βGROOM (Am + Af + sAm + sAf)] | sAm[(βAf)+ (βAm) +(βsAm) + (βsAm)+ (βI)] | sAm[(βvAm) + (βvAf) + (βvsAm) + (βvsAf)+ (βvI)] |
| MO | 0 | 0 | 0 | 0 | 0 |
| SO | 0 | 0 | 0 | 0 | 0 |

#### 4. Adult Female Intragroup Transmission Possibilities

|  | | STI | Fecal Oral | Aggression/Grooming | Aerosol | Vector |
| --- | --- | --- | --- | --- | --- | --- |
| FF  *(Bonobos)* | | Af[(βAf)+ (βAm) +(βsAm) + (βsAm)+ (βI)] | Af[(βAf)+ (βAm) +(βsAm) + (βsAm)+ (βI)] | *Dominance fights and infant protection:*  Af [βFIGHT (Am + Af + sAm + sAf)]  -------------------------------------------  *Allomothering and grooming favors:*  Af [βGROOM (Am + Af + sAm + sAf)] | Af[(βAf)+ (βAm) +(βsAm) + (βsAm)+ (βI)] | Af[(βvAm) + (βvAf) + (βvsAm) + (βvsAf)+ (βvI)] |
| MM | | *Occasional (rare) subadult copulation:*  Af[(βAm) *+(βsAm)*] | Af[(βAf)+ (βAm) +(βsAm) + (βsAm)+ (βI)] | *Dominance fights and infant protection:*  Af [βFIGHT (Am + Af + sAm + sAf)]  -------------------------------------------  *Allomothering and grooming favors:*  Af [βGROOM (Am + Af + sAf)] | Af[(βAf)+ (βAm) +(βsAm) + (βsAm)+ (βI)] | Af[(βvAm) + (βvAf) + (βvsAm) + (βvsAf)+ (βvI)] |
| UM | | *Occasional (rare) subadult copulation:*  Af[(βAm) *+(βsAm)*] | Af[(βAf)+ (βAm) +(βsAm) + (βsAm)+ (βI)] | *Dominance fights and infant protection:*  Af [βFIGHT (Am + Af + sAm + sAf)]  -------------------------------------------  *Allomothering and grooming favors:*  Af [βGROOM (Am + Af + sAf)] | Af[(βAf)+ (βAm) +(βsAm) + (βsAm)+ (βI)] | Af[(βvAm) + (βvAf) + (βvsAm) + (βvsAf)+ (βvI)] |
| MO | Af[(βAm)] | Af[(βAf)+ (βAm) + (βI)] | Few or no agonistic encounters  -------------------------------------------  *Grooming:*  Af [βGROOM (Am )] | Af[(βAf)+ (βAm) + (βI)] | Af[(βvAm) + (βvAf) + (βvI)] |
| SO  *Encounters only during breeding seasons* | | Af[(βAm)] | Af[(βAm)+ (βI)] | Few or no agonistic encounters  -------------------------------------------  Grooming:  Af [βGROOM(Am )] | Af[(βAf)+ (βAm) + (βI)] | Af[(βvAm) + (βvAf) + (βvI)] |

**5. Adult Male Intragroup Tranmission Possibilities**

|  | STI | Fecal Oral | Aggression/Grooming | Aerosol | Vector |
| --- | --- | --- | --- | --- | --- |
| FF  *(Bonobos)* | Am[(βAf)+ (βAm) +(βsAm) + (βsAm)+ (βI)] | Am[(βAm) +(βAf) + (βsAm) + (βsAf) + (βI)] | Am [βFIGHT (Am + Af + sAm + sAf + I)]  -------------------------------------------  *Grooming favors:*  Am [βGROOM (Am + Af + sAm + sAf + I)] | Am[(βAm) + (βAf) + (βsAm) + (βsAf)+ (βI)] | Am[(βvAm) + (βvAf) + (βvsAm) + (βvsAf)+ (βvI)] |
| MM | Am[(βAf)+ +(βsAf)] | Am[(βAm) + (βAf) + (βsAm) +(βsAf)+ (βI)] | Am [βFIGHT (Am + Af + sAm + sAf + I)]  -------------------------------------------  *Grooming favors:*  Am [βGROOM (Am + Af + sAm + sAf + I)] | Am[(βAm) + (βAf) + (βsAm) + (βsAf)+ (βI)] | Am[(βAm) + (βAf) + (βsAm) + (βsAf)+ (βI)] |
| UM | A­m [(βAf) +(βsAf)] | Am[(βAm) + (βAf) + (βsAm) + (βsAf)+ (βI)] | Am [βFIGHT (Am + Af + sAm + sAf + I)]  -------------------------------------------  *Grooming favors:*  Am [βGROOM (Af + sAm + sAf + I)] | Am[(βAm) + (βAf) + (βsAm) + (βsAf)+ (βI)] | Am[(βAm) + (βAf) + (βsAm) + (βsAf)+ (βI)] |
| MO | Am[(βAf)] | Am[(βAf) +(βI)] | 0  -------------------------------------------  *Grooming favors:*  Am [βGROOM (Af + sAm + sAf + I)] | Am[(βAm) + (βAf) + (βI)] | Am[(βAm) + (βAf) + (βI)] |
| SO  *Encounters only during breeding seasons* | Am[(βAf)] | Am[(βAf)+ (βI)] | 0 | 0 | Am[(βvAf)] |

**6. Infant Intergroup Transmission Possibilities**

|  | STI | Fecal Oral | Aggression/Grooming | Aerosol | Vector |
| --- | --- | --- | --- | --- | --- |
| FF  *(Bonobos)* | 0 | I[(βAm)1,2 + (βAf)1,2 + (βsAm)1,2 + (βsAf)1,2 + (βI) 1,2] | *Infanticidal takeovers:*  I1[(βAm)+ (βAf) + (βsAm)] 2 | 0 | I1Δ[(βvAm) + (βvAf) + (βvsAm) + (βvsAf)+ (βvI)]2 |
| MM | 0 | I[(βAm)1,2 + (βAf)1,2 + (βsAm) 1,2 + (βsAf) 1,2 + (βI) 1,2] | *Infanticidal takeovers:*  I1[(βAm) + (βAf) + (βsAm)] 2 | 0 | I1Δ[(βvAm) + (βvAf) + (βvsAm) + (βvsAf)+ (βvI)]2 |
| UM | 0 | I[(βAm)1,2 + (βAf)1,2 + (βsAm) 1,2 + (βsAf)1,2 + (βI) 1,2] | *Infanticidal takeovers:*  I1[(βAm)+ (βAf) + (βsAm)] 2 | 0 | I1Δ[(βvAm) + (βvAf) + (βvsAm) + (βvsAf)+ (βvI)]2 |
| MO | 0 | I[(βAm)1,2 + (βAf) 1,2 + (βI) 1,2] | 0 | 0 | I1Δ[(βvAm) + (βvAf) + (βvI)]2 |
| SO  *Infants still in the natal group* | 0 |  | 0 | 0 | I1Δ[(βvAm) + (βvAf) + (βvI)]2 |

##### 7. Subdult Female Intergroup Transmission Possibilities

|  | STI | Fecal Oral | Aggression/Grooming | Aerosol | Vector |
| --- | --- | --- | --- | --- | --- |
| FF  *(Bonobos)* | a,bεsAf) [(βAm) + (βAf) + (βsAm)+ (βsAf)+ (βI)]2  &  (isAf) [(βAm) + (βAf) + (βsAm)+ (βsAf) + (βI)]1 | a,b (εsAf) [(βAm) + (βAf) + (βsAm)+ (βsAf)+ (βI)]2  &  (isAf) [(βAm) + (βAf) + (βsAm)+ (βsAf) + (βI)]1 | *Emigrating and immigrating subadult females having fights*:  (εsAf) βFIGHT [(Am) + (Af) + (sAm)+ (sAf)]2  &  (isAf)βFIGHT [ (Am) + (Af) + (sAm)+ (sAf)]1 | a,b(εsAf) [(βAm) + (βAf) + (βsAm)+ (βsAf)+ (βI)]2  &  (isAf) [(βAm) + (βAf) + (βsAm)+ (βsAf) + (βI)]1 | sAf1Δ [(βv Am) + (βvAf) + (βvI)]2 |
| MM | a,b(εsAf) [(βAm) + (βAf) + (βsAm)+ (βsAf)+ (βI)]2  &  (isAf) [(βAm) + (βAf) + (βsAm)+ (βsAf) + (βI)]1 | a,b(εsAf) [(βAm) + (βAf) + (βsAm)+ (βsAf)+ (βI)]2  &  (isAf) [(βAm) + (βAf) + (βsAm)+ (βsAf) + (βI)]1 | *Emigrating and immigrating subadult females having fights*:  (εsAf) [βFIGHT (Am) + (Af) + (sAm)+ (sAf)]2  &  (isAf) [βFIGHT (Am) + (Af) + (sAm)+ (sAf)]1 | a,b(εsAf) [(βAm) + (βAf) + (βsAm)+ (βsAf)+ (βI)]2  &  (isAf) [(βAm) + (βAf) + (βsAm)+ (βsAf) + (βI)]1 | sAf1Δ[(βvAm) + (βvAf) + (βvI)]2 |
| UM | a,b(εsAf) [(βAm) + (βAf) + (βsAm)+ (βsAf)+ (βI)]2  &  (isAf) [(βAm) + (βAf) + (βsAm)+ (βsAf) + (βI)]1 | a,b(εsAf) [(βAm) + (βAf) + (βsAm)+ (βsAf)+ (βI)]2  &  (isAf) [(βAm) + (βAf) + (βsAm)+ (βsAf) + (βI)]1 | *Emigrating and immigrating subadult females having fights*:  (εsAf) [βFIGHT (Am) + (Af) + (sAm)+ (sAf)]2  &  (isAf) [βFIGHT (Am) + (Af) + (sAm)+ (sAf)]1 | a,b(εsAf) [(βAm) + (βAf) + (βsAm)+ (βsAf)+ (βI)]2  &  (isAf) [(βAm) + (βAf) + (βsAm)+ (βsAf) + (βI)]1 | sAf1Δ[(βvAm) + (βvAf) + (βvI)]2 |
| MO | 0 | 0 | 0 | 0 | 0 |
| SO | 0 | 0 | 0 | 0 | 0 |

*aWhen subadult females are the age class that leaves the natal group*

*bEmigrating and immigrating subadult females having effects on groups 1 and 2***8. Subdult Male Intergroup Transmission Possibilities**

|  | STI | Fecal Oral | Aggression/Grooming | Aerosol | Vector |
| --- | --- | --- | --- | --- | --- |
| FF  *(Bonobos)* | a,b (εsAm) [(βAm) + (βAf) + (βsAm)+ (βsAf)+ (βI)]2  &  (iAm) [(βAm) + (βAf) + (βsAm)+ (βsAf) + (βI)] | a,b (εsAm) [(βAm) + (βAf) + (βsAm)+ (βsAf)+ (βI)]2  &  (iAm) [(βAm) + (βAf) + (βsAm)+ (βsAf) + (βI)] | a,b (εsAm + iAm) [βFIGHT (Am)1,2 + (Af)1,2 + (sAm) 1,2 + (sAf) 1,2] | a,b (εsAm) [(βAm) + (βAf) + (βsAm)+ (βsAf)+ (βI)]2  &  (iAm) [(βAm) + (βAf) + (βsAm)+ (βsAf) + (βI)] | sAm1Δ[(βvAm) + (βvAf) + (βvsAm) + (βvsAf)+ (βvI)]2 |
| MM | a,b (εsAm) [(βAm) + (βAf) + (βsAm)+ (βsAf)+ (βI)]2  &  (iAm) [(βAm) + (βAf) + (βsAm)+ (βsAf) + (βI)] | a,b (εsAm) [(βAm) + (βAf) + (βsAm)+ (βsAf)+ (βI)]2  &  (iAm) [(βAm) + (βAf) + (βsAm)+ (βsAf) + (βI)] | a,b (εsAm + iAm) [βFIGHT (βAm)1,2 + (βAf)1,2 + (βsAm) 1,2 + (βsAf) 1,2 + (βI) 1,2] | a,b (εsAm) [(βAm) + (βAf) + (βsAm)+ (βsAf)+ (βI)]2  &  (iAm) [(βAm) + (βAf) + (βsAm)+ (βsAf) + (βI)] | sAm1Δ[(βvAm) + (βvAf) + (βvsAm) + (βvsAf)+ (βvI)]2 |
| UM | (εsAm) [(βAm) + (βAf) + (βsAm)+ (βsAf)+ (βI)]2  &  (iAm) [(βAm) + (βAf) + (βsAm)+ (βsAf) + (βI)] | (εsAm) [(βAm) + (βAf) + (βsAm)+ (βsAf)+ (βI)]2  &  (iAm) [(βAm) +  (βAf) +(βsAm)+ (βsAf) +(βI)] | (εsAm + iAm) [βFIGHT (βAm)1,2 + (βAf)1,2 + (βsAm) 1,2 + (βsAf) 1,2 + (βI) 1,2] | (εsAm) [(βAm) + (βAf) + (βsAm)+ (βsAf)+ (βI)]2  &  (iAm) [(βAm) + (βAf) + (βsAm)+ (βsAf) + (βI)] | sAm1Δ[(βvAm) + (βvAf) + (βvsAm) + (βvsAf)+ (βvI)]2 |
| MO | 0 | 0 | 0 | 0 | 0 |
| SO | 0 | 0 | 0 | 0 | 0 |

*a When subadult males are the age class that leaves the natal group*

*b Emigrating and immigrating subadult males having effects on groups 1 and 2***9. Adult Female Intergroup Transmission Possibilities**

|  | STI | Fecal Oral | Aggression/Grooming | Aerosol | Vector |
| --- | --- | --- | --- | --- | --- |
| FF  *(Bonobos)* | 0 | *Rate at which adult female ranges overlap other groups:*  Af[(βAm) + (βAf) + (βsAm) + (βsAf) + (βI)]2 | *Territorial and infant defense:*  Af βFIGHT [ (Am)2 + (Af)2 + (sAm)2 + (sAf)2] | *Rate at which adult female ranges overlap other groups:*  Af[(βAm) + (βAf) + (βsAm) + (βsAf) + (βI)]2 | Af1Δ[(βvAm) + (βvAf) + (βvsAm) + (βvsAf)+ (βvI)]2 |
| MM | 0 | *Rate at which adult female ranges overlap other groups:*  Af[(βAm) + (βAf) + (βsAm) + (βsAf) + (βI)]2 | *Territorial and infant defense:*  Af βFIGHT [(Am)2 + (Af)2 + (sAm)2 + (sAf)2] | *Rate at which adult female ranges overlap other groups:*  Af[(βAm) + (βAf) + (βsAm) + (βsAf) + (βI)]2 | Af1Δ[(βvAm) + (βvAf) + (βvsAm) + (βvsAf)+ (βvI)]2 |
| UM | 0 | *Rate at which adult female ranges overlap other groups:*  Af[(βAm) + (βAf) + (βsAm) + (βsAf) + (βI)]2 | *Territorial and infant defense:*  Af βFIGHT [(Am)2 + (Af)2 + (sAm)2 + (sAf)2] | *Rate at which adult female ranges overlap other groups:*  Af[(βAm) + (βAf) + (βsAm) + (βsAf) + (βI)]2 | Af1Δ[(βvAm) + (βvAf) + (βvsAm) + (βvsAf)+ (βvI)]2 |
| MO | 0a | *Rate at which adult female joins with new partners:* Af[(βAm)]2 | *Territorial and infant defense:*  Af βFIGHT [(Am)2 + (Af)2] | *Rate at which adult female joins with new partners:* Af[(βAm)]2 | Af1Δ[(βvAm) + (βvAf) + (βvI)]2 |
| SO | 0a | *Rate at which adult female joins with new partners:* Af[(βAm)]2 | *Territorial and infant defense:*  Af βFIGHT [(Am)2 + (Af)2] | *Rate at which adult female joins with new partners:* Af[(βAm)]2 | Af1Δ[(βvAm) + (βvAf) + (βvI)]2 |

a *Except for serial monogamy* **10. Adult Male Intergroup Transmission Possibilities**

|  | STI | Fecal Oral | Aggression/Grooming | Aerosol | Vector |
| --- | --- | --- | --- | --- | --- |
| FF  *(Bonobos)* | 0 | *Rate at which adult male ranges overlap other groups:* Am[(βAm)1,2 + (βAf)1,2 + (βsAm)1,2 + (βsAf)1,2 + (βI)1,2] | *Territorial defense:*  Am βFIGHT [(Am)2 + (Af)2 + (sAm)2 + (sAf)2] | *Rate at which adult male ranges overlap other groups:* Am[(βAm)1,2 + (βAf)1,2 + (βsAm)1,2 + (βsAf)1,2 + (βI)1,2] | Am1Δ[(βvAm) + (βvAf) + (βvsAm) + (βvsAf)+ (βvI)]2 |
| MM | 0 | *Rate at which adult male ranges overlap other groups:* Am[(βAm)1,2 + (βAf)1,2 + (βsAm)1,2 + (βsAf)1,2 + (βI)1,2] | *Territorial defense:*  Am βFIGHT [(Am)2 + (Af)2 + (sAm)2 + (sAf)2] | *Rate at which adult male ranges overlap other groups:* Am[(βAm)1,2 + (βAf)1,2 + (βsAm)1,2 + (βsAf)1,2 + (βI)1,2] | Am1Δ[(βvAm) + (βvAf) + (βvsAm) + (βvsAf)+ (βvI)]2 |
| UM | 0 | *Rate at which adult male ranges overlap other groups:* Am[(βAm)1,2 + (βAf)1,2 + (βsAm)1,2 + (βsAf)1,2 + (βI)1,2] | *Territorial defense:*  Am βFIGHT [(Am)2 + (Af)2 + (sAm)2 + (Af)2] | *Rate at which adult male ranges overlap other groups:* Am[(βAm)1,2 + (βAf)1,2 + (βsAm)1,2 + (βsAf)1,2 + (βI)1,2] | Am1Δ[(βvAm) + (βvAf) + (βvsAm) + (βvsAf)+ (βvI)]2 |
| MO | 0a | *Rate at which adult male joins with new partners:* Am[(βAm)1,2 + (βAf)1,2 + (βI)1,2] | *Territorial defense:*  Am βFIGHT [(Am)2 + (Af)2] | *Rate at which adult male ranges overlap other groups:* Am[(βAm)1,2 + (βAf)1,2 + (βI)1,2] | Am1Δ[(βvAm) + (βvAf) + (βvI)]2 |
| SO | bAm(βAf)n | *Rate at which adult male joins with new partners:*  Am[(βAm)1,2 + (βAf)1,2 + (βI)1,2] | *Territorial defense:*  Am βFIGHT [(Am)2 + (Af)2] | *Rate at which adult male ranges overlap other groups:* Am[(βAm)1,2 + (βAf)1,2 + (βI)1,2] | Am1Δ[(βvAm) + (βvAf) + (βvI)]2 |

*a Except for serial monogamy*

*b Serial sexual acts in n different groups*
